# Supplementary material for: Nutritional and Clinical Factors Affecting Weight and Fat-Free Mass Loss after Gastrectomy in Patients with Gastric Cancer
Source: MDPI journal article supplement (doi:10.3390/nu12071905), 2020-06-27
Supplement: s1 [file s1]

**Supplementary 1. Change of micronutrient intake per day for each postoperative period after gastrectomy (N=288)**

| Variable                    | Baseline          | 1 month           | 3 months        | 6 months          | p-value                   |
|-----------------------------|-------------------|-------------------|-----------------|-------------------|---------------------------|
| Iron (mg)                   | 12.42 ± 4.11      | 8.38 ± 3.34       | 8.90 ± 2.85     | 11.23 ± 4.32      | 0.014 <sup>a, b, d</sup>  |
| Sodium (mg)                 | 3,867.3 ± 1,750.3 | 2,911.2 ± 1,421.2 | 3,106.4 ± 928.6 | 3,937.5 ± 1,757.4 | 0.593                     |
| Potassium (mg)              | 2,439.7 ± 789.3   | 1,671.9 ± 674.6   | 1,971.9 ± 552.4 | 2,270.6 ± 854.8   | 0.005 <sup>a</sup>        |
| Zinc (mg)                   | 7.40 ± 2.75       | 4.99 ± 2.32       | 6.78 ± 2.07     | 6.51 ± 2.93       | <0.001 <sup>a c</sup>     |
| Vitamin A (mg RAE)          | 853.8 ± 531.0     | 668.2 ± 366.7     | 693.2 ± 214.7   | 782.9 ± 502.6     | 0.379                     |
| Vitamin B <sub>1</sub> (mg) | 1.20 ± 0.60       | 0.90 ± 0.53       | 0.92 ± 0.22     | 1.01 ± 0.41       | 0.002 <sup>a, b</sup>     |
| Vitamin B <sub>2</sub> (mg) | 1.11 ± 0.64       | 0.82 ± 0.41       | 0.83 ± 0.44     | 0.92 ± 0.55       | 0.561                     |
| Vitamin B <sub>6</sub> (mg) | 1.81 ± 0.73       | 1.20 ± 0.65       | 1.28 ± 0.45     | 1.61 ± 0.70       | <0.001 <sup>a, b, d</sup> |
| Niacin (mg NE)              | 15.22 ± 6.90      | 12.9 ± 4.90       | 13.10 ± 4.46    | 14.32 ± 5.14      | 0.248                     |
| Vitamin C (mg)              | 118.32 ± 83.43    | 66.37 ± 60.0      | 82.38 ± 25.31   | 112.44 ± 55.10    | <0.001 <sup>a, b, d</sup> |
| Folic acid (mg)             | 258.4 ± 124.9     | 180.30 ± 82.94    | 178.42 ± 56.50  | 199.97 ± 113.65   | 0.751                     |
| Vitamin E (mg α-TE)         | 11.14 ± 7.25      | 8.94 ± 4.72       | 9.87 ± 5.61     | 10.06 ± 6.24      | 0.694                     |

The micronutrient factors of the subjects were summarized in terms of mean and standard deviation for continuous variables.

<sup>a</sup> there exists the significant difference between baseline and one month.

<sup>b</sup> there exists the significant difference between baseline and three months.

<sup>c</sup> there exists the significant difference between one months and three months.

<sup>d</sup> there exists the significant difference between one months and six months.

**Supplementary 2. Change of micronutrient intake per day for each postoperative period after gastrectomy in males (N=165)**

| Variable                    | DRI                | Baseline          | 1 month           | 3 months        | 6 months          | p-value                   |
|-----------------------------|--------------------|-------------------|-------------------|-----------------|-------------------|---------------------------|
| Iron (mg)                   | 10 <sup>1)</sup>   | 12.13 ± 3.62      | 8.81 ± 2.16       | 8.92 ± 2.87     | 11.25 ± 3.19      | 0.014 <sup>a, b, d</sup>  |
| Sodium (mg)                 | 1500 <sup>2)</sup> | 3,928.6 ± 1,428.0 | 2,953.3 ± 1,456.8 | 3,110.2 ± 736.5 | 3,940.4 ± 1,468.2 | 0.426                     |
| Potassium (mg)              | 3500 <sup>2)</sup> | 2,619.3 ± 716.8   | 1,692.4 ± 582.7   | 1,980.4 ± 590.8 | 2,270.6 ± 841.7   | 0.005 <sup>a</sup>        |
| Zinc (mg)                   | 9 <sup>1)</sup>    | 7.31 ± 1.96       | 5.10 ± 2.28       | 6.81 ± 2.10     | 6.78 ± 2.75       | <0.001 <sup>a c</sup>     |
| Vitamin A (mg RAE)          | 750 <sup>1)</sup>  | 861.9 ± 522.8     | 671.3 ± 356.4     | 695.6 ± 218.5   | 780.5 ± 481.5     | 0.368                     |
| Vitamin B <sub>1</sub> (mg) | 1.2 <sup>1)</sup>  | 1.21 ± 0.45       | 0.91 ± 0.54       | 0.92 ± 0.18     | 1.02 ± 0.28       | 0.006 <sup>a, b</sup>     |
| Vitamin B <sub>2</sub> (mg) | 1.5 <sup>1)</sup>  | 1.13 ± 0.71       | 0.83 ± 0.36       | 0.84 ± 0.50     | 0.91 ± 0.56       | 0.509                     |
| Vitamin B <sub>6</sub> (mg) | 1.5 <sup>1)</sup>  | 1.84 ± 0.59       | 1.21 ± 0.66       | 1.27 ± 0.51     | 1.64 ± 0.42       | <0.001 <sup>a, b, d</sup> |
| Niacin (mg NE)              | 16 <sup>1)</sup>   | 15.49 ± 4.81      | 12.89 ± 5.01      | 13.14 ± 5.02    | 14.03 ± 4.69      | 0.446                     |
| Vitamin C (mg)              | 100 <sup>1)</sup>  | 119.20 ± 68.17    | 69.53 ± 58.7      | 80.51 ± 26.46   | 110.37 ± 60.25    | 0.002 <sup>a, b, d</sup>  |
| Folic acid (mg)             | 400 <sup>1)</sup>  | 260.5 ± 120.4     | 185.24 ± 79.68    | 180.30 ± 44.28  | 198.56 ± 107.28   | 0.760                     |
| Vitamin E (mg α-TE)         | 12 <sup>2)</sup>   | 11.25 ± 6.83      | 8.95 ± 3.91       | 9.86 ± 5.45     | 10.11 ± 5.94      | 0.581                     |

The micronutrient factors of the subjects were summarized in terms of mean and standard deviation for continuous variables.

DRI, Dietary Reference Intakes for Koreans 2015.

<sup>1)</sup> RNI, recommended nutrient intake; <sup>2)</sup> AI, adequate intake.

<sup>a</sup> there exists the significant difference between baseline and one month.

<sup>b</sup> there exists the significant difference between baseline and three months.

<sup>c</sup> there exists the significant difference between one months and three months.

<sup>d</sup> there exists the significant difference between one months and six months.

**Supplementary 3. Change of micronutrient intake per day for each postoperative period after gastrectomy in females (N=123)**

| Variable                    | DRI                | Baseline          | 1 month           | 3 months        | 6 months          | p-value                   |
|-----------------------------|--------------------|-------------------|-------------------|-----------------|-------------------|---------------------------|
| Iron (mg)                   | 8 <sup>1)</sup>    | 11.39 ± 5.02      | 7.92 ± 3.34       | 8.82 ± 2.79     | 10.95 ± 3.28      | 0.004 <sup>a, d</sup>     |
| Sodium (mg)                 | 1500 <sup>2)</sup> | 3,867.3 ± 1,750.3 | 2,911.2 ± 1,421.2 | 3,101.2 ± 936.1 | 3,926.4 ± 1,824.6 | 0.272                     |
| Potassium (mg)              | 3500 <sup>2)</sup> | 2,339.4 ± 716.8   | 1,650.3 ± 701.5   | 1,968.4 ± 562.0 | 2,271.4 ± 624.5   | 0.005 <sup>a</sup>        |
| Zinc (mg)                   | 7 <sup>1)</sup>    | 7.41 ± 3.15       | 4.68 ± 2.40       | 6.70 ± 3.05     | 6.50 ± 2.90       | 0.004 <sup>a, c</sup>     |
| Vitamin A (mg RAE)          | 600 <sup>1)</sup>  | 848.7 ± 628.1     | 680.4 ± 391.5     | 691.0 ± 208.6   | 785.9 ± 460.7     | 0.470                     |
| Vitamin B <sub>1</sub> (mg) | 1.2 <sup>1)</sup>  | 1.19 ± 0.58       | 0.90 ± 0.53       | 0.94 ± 0.34     | 1.10 ± 0.25       | 0.002 <sup>a</sup>        |
| Vitamin B <sub>2</sub> (mg) | 1.2 <sup>1)</sup>  | 1.10 ± 0.71       | 0.84 ± 0.45       | 0.85 ± 0.48     | 0.93 ± 0.56       | 0.631                     |
| Vitamin B <sub>6</sub> (mg) | 1.4 <sup>1)</sup>  | 1.79 ± 0.52       | 1.19 ± 0.70       | 1.30 ± 0.29     | 1.58 ± 0.43       | <0.001 <sup>a, b, d</sup> |
| Niacin (mg NE)              | 14 <sup>1)</sup>   | 15.01 ± 5.22      | 12.91 ± 5.16      | 13.95 ± 2.68    | 14.31 ± 4.60      | 0.318                     |
| Vitamin C (mg)              | 100 <sup>1)</sup>  | 117.25 ± 80.19    | 65.24 ± 71.2      | 85.61 ± 24.20   | 113.50 ± 46.97    | <0.001 <sup>a, b</sup>    |
| Folic acid (mg)             | 400 <sup>1)</sup>  | 259.30 ± 120.8    | 178.61 ± 80.91    | 179.25 ± 63.48  | 200.37 ± 116.58   | 0.529                     |
| Vitamin E (mg α-TE)         | 12 <sup>2)</sup>   | 11.02 ± 5.64      | 8.93 ± 5.18       | 9.92 ± 4.82     | 10.03 ± 6.61      | 0.423                     |

The micronutrient factors of the subjects were summarized in terms of mean and standard deviation for continuous variables.

DRI, Dietary Reference Intakes for Koreans 2015.

<sup>1)</sup> RNI, recommended nutrient intake; <sup>2)</sup> AI, adequate intake.

<sup>a</sup> there exists the significant difference between baseline and one month.

<sup>b</sup> there exists the significant difference between baseline and three months.

<sup>c</sup> there exists the significant difference between one months and three months.

<sup>d</sup> there exists the significant difference between one months and six months.
